# Supplementary material for: Influence of Lactose Supplementation on Regulation of Streptococcus thermophilus on Gut Microbiota
Source: MDPI journal article supplement (doi:10.3390/nu15224767), 2023-11-13
Supplement: s1 [file s1]

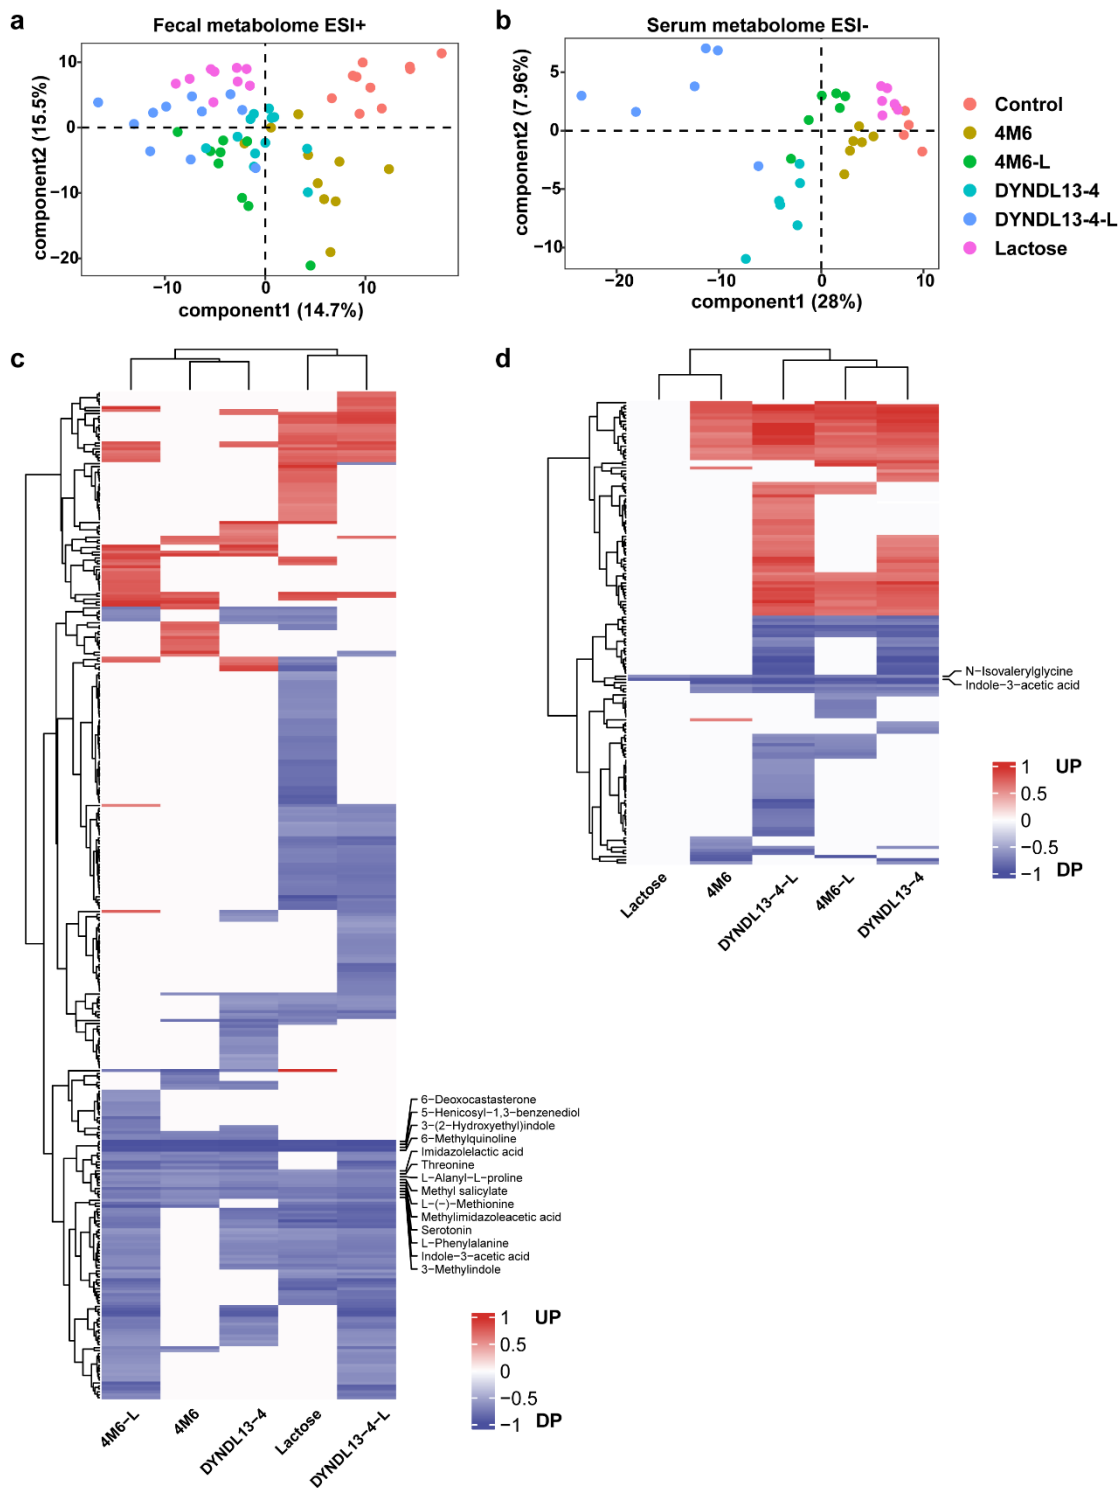

**Figure S1.** Effect of lactose supplementation on metabolic profile induced by *S. thermophilus* related to Figure. 2 and Figure.3. a, PLS-DA score plots based on the fecal metabolomic profiles in positive ionization modes. b, PLS-DA score plots based on the serum metabolomic profiles in negative ionization modes. c-d, Heatmap of the differential metabolites of each treatment relative to the control in feces (c) and serum (d).

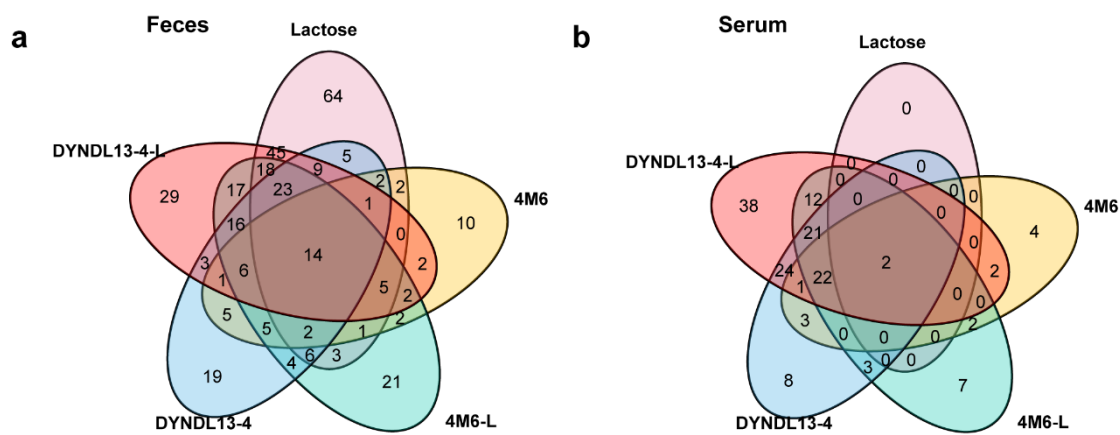

**Figure S2.** Venn diagram of all identified metabolites of each treatment relative to the control in feces (a) and serum (b).
